# Supplementary material
Source: PubMed Central journal article supplement (PMC8221368)
Supplement: ehp8523.s001.acco.pdf [file ehp8523.s001.acco.pdf]

**Note to readers with disabilities:** *EHP* strives to ensure that all journal content is accessible to all readers. However, some figures and Supplemental Material published in *EHP* articles may not conform to [508 standards](#) due to the complexity of the information being presented. If you need assistance accessing journal content, please contact [ehp508@niehs.nih.gov](mailto:ehp508@niehs.nih.gov). Our staff will work with you to assess and meet your accessibility needs within 3 working days.

### **Supplemental Material**

#### **Cadmium Exposure and Coronary Artery Atherosclerosis: A Cross-Sectional Population-Based Study of Swedish Middle-Aged Adults**

Lars Barregard, Gerd Sallsten, Florencia Harari, Eva M. Andersson, Niklas Forsgard, Ola Hjelmgren, Oskar Angerås, Erika Fagman, Margaretha Persson, Thomas Lundh, Yan Borné, Björn Fagerberg, Gunnar Engström, and Göran Bergström

#### **Table of Contents**

**Table S1.** Results for analysis of cadmium in certified reference materials from Sero AS, Billingstad, Norway.

**Table S2.** Distribution of blood cadmium (B-Cd) overall, by gender, and in never-smokers.

**Table S3.** Odds ratios (95% confidence intervals) for coronary artery calcium score (Agatston score)  $>0$ , and  $\geq 100$  by sex and blood cadmium concentration in a Swedish population-based cohort. Quartiles are mutually-exclusive, but cut-points in the columns are rounded.

**Table S4.** Odds ratios (OR), with 95% confidence intervals (CI) for coronary artery calcium score (Agatston score)  $>0$ , and  $\geq 100$  by sex and blood cadmium concentration in never-smokers in a Swedish population-based cohort. Quartiles are mutually-exclusive, but cut-points in the columns are rounded.

**Table S5.** Prevalence ratios (95% confidence intervals) for coronary artery calcium scores (Agatston score)  $>0$  and  $\geq 100$ , overall and by sex for sensitivity analyses with additional adjustment for cardiovascular risk factors, study site, and smoking pack-years, respectively, and after excluding participants with the highest ( $n = 26$ ) and lowest ( $n = 26$ ) exposures. Quartiles are mutually-exclusive, but cut points in the columns are rounded.

**Figure S1.** Adjusted PRs (solid line) with 95% CI (short dashed lines) for the relation between blood cadmium concentrations ( $\mu\text{g/L}$ ) and CACS  $>0$  (Model 2, Table S5, All individuals, but 52 individuals excluded). Prevalence ratios were modelled using unrestricted cubic splines with three knots (0.16, 0.24 and 0.38) at percentiles 25%, 50% and 75%, in a Poisson regression model adjusted for age, sex, smoking, hypertension, diabetes, family history, and LDL/HDL ratio. The reference value for blood cadmium was 0.12  $\mu\text{g/L}$  (median for Q1). The histogram shows the frequency distribution of blood cadmium concentrations.

**Figure S2.** Adjusted PRs (solid line) with 95% CI (short dashed lines) for the relation between blood cadmium concentrations ( $\mu\text{g/L}$ ) and CACS  $>0$  among men (A) and women (B) (Model 2, Table S5, 52 individuals excluded). Prevalence ratios were modelled using unrestricted cubic splines with three knots (0.13, 0.19 and 0.30 for men, 0.20, 0.29, 0.44 for women) at percentiles 25%, 50% and 75%, in a Poisson regression model adjusted for age, sex, smoking, hypertension, diabetes, family history, and LDL/HDL ratio. The reference value for blood cadmium was 0.12  $\mu\text{g/L}$  (median for Q1). The histogram shows the frequency distribution of blood cadmium concentrations.

**Figure S3.** Adjusted PRs (solid line) with 95% CI (short dashed lines) for the relation between blood cadmium concentrations ( $\mu\text{g/L}$ ) and CACS  $\geq 100$  among men (A) and women (B) (Model 2, Table S5, 52 individuals excluded). Prevalence ratios were modelled using unrestricted cubic splines with three knots (0.13, 0.19 and 0.30 for men, 0.20, 0.29, 0.44 for women) at percentiles 25%, 50% and 75%, in a Poisson regression model adjusted for age, sex, smoking, hypertension, diabetes, family history, and LDL/HDL ratio. The reference value for blood cadmium was 0.12  $\mu\text{g/L}$  (median for Q1). The histogram shows the frequency distribution of blood cadmium concentrations.

**Figure S4.** Adjusted PRs (solid line) with 95% CI (short dashed lines) for the relation between blood cadmium concentrations ( $\mu\text{g/L}$ ) and CACS  $>0$  among never-smokers (Model 2, Table 3, but 52 individuals excluded). Prevalence ratios were modelled using unrestricted cubic splines with three knots (0.14, 0.19 and 0.27) at percentiles 25%, 50% and 75%, in a Poisson regression model adjusted for age, sex, smoking, hypertension, diabetes, family history, and LDL/HDL ratio. The reference value for blood cadmium was 0.12  $\mu\text{g/L}$  (median for Q1). The histogram shows the frequency distribution of blood cadmium concentrations.

**Figure S5.** Adjusted PRs (solid line) with 95% CI (short dashed lines) for the relation between blood cadmium concentrations ( $\mu\text{g/L}$ ) and CACS  $\geq 100$  among never-smokers (Model 2, Table 3, but 52 individuals excluded). Prevalence ratios were modelled using unrestricted cubic splines with three knots (0.14, 0.19 and 0.27) at percentiles 25%, 50% and 75%, in a Poisson regression model adjusted for age, sex, smoking, hypertension, diabetes, family history, and LDL/HDL ratio. The reference value for blood cadmium was 0.12  $\mu\text{g/L}$  (median for Q1). The histogram shows the frequency distribution of blood cadmium concentrations.

## Supplemental material

**Table S1.** Results for analysis of cadmium in certified reference materials from Sero AS,

Billingstad, Norway.

| Laboratory | Seronorm Trace elements whole blood | Number of samples | Obtained concentration | Recommended concentration |
|------------|-------------------------------------|-------------------|------------------------|---------------------------|
| Gothenburg | L-1, lot. 1103128                   | 103               | 0.34±0.01              | 0.36±0.20                 |
|            | L-2, lot. 1103129                   | 103               | 5.8±0.17               | 5.8±0.20                  |
| Lund       | L-1, lot. 1702821                   | 48                | 0.28±0.01              | 0.28±0.06                 |
|            | L-2, lot. 1702825                   | 48                | 5.0±0.27               | 5.1±1.0                   |

**Table S2.** Distribution of blood cadmium (B-Cd) overall, by gender, and in never-smokers.

| <b>B-Cd percentiles</b> | <b>All participants</b> | <b>All women</b> | <b>All men</b> | <b>All never-smokers</b> | <b>Female never-smokers</b> | <b>Male never-smokers</b> |
|-------------------------|-------------------------|------------------|----------------|--------------------------|-----------------------------|---------------------------|
| 0.5                     | 0.06                    | 0.08             | 0.05           | 0.06                     | 0.08                        | 0.05                      |
| 10                      | 0.12                    | 0.15             | 0.10           | 0.10                     | 0.13                        | 0.09                      |
| 25                      | 0.16                    | 0.20             | 0.13           | 0.13                     | 0.18                        | 0.11                      |
| 50                      | 0.24                    | 0.29             | 0.19           | 0.19                     | 0.25                        | 0.15                      |
| 75                      | 0.39                    | 0.45             | 0.30           | 0.27                     | 0.33                        | 0.20                      |
| 90                      | 0.76                    | 0.86             | 0.65           | 0.39                     | 0.46                        | 0.27                      |
| 99.5                    | 2.70                    | 3.28             | 2.46           | 0.93                     | 1.05                        | 0.68                      |

**Table S3.** Odds ratios (95% confidence intervals) for coronary artery calcium score (Agatston score) >0, and ≥100 by sex and blood cadmium concentration in a Swedish population-based cohort. Quartiles are mutually-exclusive, but cut-points in the columns are rounded.

| Outcome, group, and model  | Number of subjects/cases | OR per 1 µg/L  | OR (95% CI) and number of cases/total number per quartile of blood cadmium (Q1 – Q4) in µg/L |                              |                              |                              |
|----------------------------|--------------------------|----------------|----------------------------------------------------------------------------------------------|------------------------------|------------------------------|------------------------------|
|                            |                          |                | 1                                                                                            | 2                            | 3                            | 4                            |
|                            |                          |                | <0.16                                                                                        | 0.16 – 0.24                  | 0.24 – 0.39                  | 0.39 – 8.5                   |
| <b>Calcium score &gt;0</b> |                          |                |                                                                                              |                              |                              |                              |
| <b>All</b>                 |                          |                |                                                                                              |                              |                              |                              |
| Model 1 (age and sex)      | 2301/5627                | 1.2 (1.1, 1.3) | 1.0<br>(622/1407)                                                                            | 1.0 (0.9, 1.2)<br>(561/1406) | 1.0 (0.8, 1.2)<br>(492/1407) | 1.6 (1.4, 1.9)<br>626/1407   |
| Model 2 <sup>a</sup>       | 2143/5295                | 1.5 (1.2, 1.8) | 1.0<br>(574/1329)                                                                            | 1.0 (0.8, 1.2)<br>(527/1342) | 0.9 (0.8, 1.1)<br>(454/1320) | 1.3 (1.1, 1.6)<br>(588/1304) |
| <b>Women</b>               |                          |                |                                                                                              |                              |                              |                              |
| Model 1 (age)              | 781/2893                 | 1.2 (1.1, 1.4) | 1.0<br>(82/355)                                                                              | 1.0 (0.7, 1.4)<br>(172/678)  | 0.9 (0.7, 1.2)<br>(222/939)  | 1.6 (1.2, 2.1)<br>(305/921)  |
| Model 2 <sup>a</sup>       | 735/2745                 | 1.4 (1.1, 1.8) | 1.0<br>(73/338)                                                                              | 1.1 (0.8, 1.5)<br>(164/659)  | 0.9 (0.6, 1.2)<br>(206/883)  | 1.3 (0.9, 1.7)<br>(292/865)  |
| <b>Men</b>                 |                          |                |                                                                                              |                              |                              |                              |
| Model 1 (age)              | 1520/2734                | 1.2 (1.1, 1.2) | 1.0<br>540/1042)                                                                             | 1.0 (0.8, 1.2)<br>389/728    | 1.1 (0.9, 1.4)<br>270/468    | 1.7 (1.3, 2.1)<br>321/486    |
| Model 2 <sup>a</sup>       | 1408/2550                | 1.6 (1.1, 2.2) | 1.0<br>501/991                                                                               | 1.0 (0.8, 1.2)<br>363/683    | 1.0 (0.8, 1.3)<br>248/437    | 1.5 (1.1, 2.1)<br>296/439    |
| <b>Calcium score ≥100</b>  |                          |                |                                                                                              |                              |                              |                              |
| <b>All</b>                 |                          |                |                                                                                              |                              |                              |                              |
| Model 1 (age and sex)      | 702/5627                 | 1.9 (1.7, 2.2) | 1.0<br>163/1407                                                                              | 1.1 (0.9, 1.4)<br>161/1406   | 1.2 (0.9, 1.5)<br>138/1407   | 2.5 (2.0, 3.1)<br>240/1407   |
| Model 2 <sup>a</sup>       | 654/5295                 | 1.7 (1.4, 2.1) | 1.0<br>148/1329                                                                              | 1.1 (0.9, 1.4)<br>152/1342   | 1.0 (0.8, 1.4)<br>126/1320   | 1.9 (1.4, 2.5)<br>228/1304   |
| <b>Women</b>               |                          |                |                                                                                              |                              |                              |                              |
| Model 1 (age)              | 181/2893                 | 2.0 (1.6, 2.5) | 1.0<br>10/355                                                                                | 1.3 (0.6, 2.8)<br>28/678     | 1.6 (0.8, 3.3)<br>48/939     | 3.8 (1.9, 7.4)<br>95/921     |
| Model 2 <sup>a</sup>       | 170/2745                 | 1.9 (1.4, 2.5) | 1.0<br>8/338                                                                                 | 1.4 (0.6, 3.2)<br>27/659     | 1.6 (0.7, 3.5)<br>45/883     | 2.9 (1.3, 6.3)<br>90/865     |
| <b>Men</b>                 |                          |                |                                                                                              |                              |                              |                              |
| Model 1 (age)              | 521/2734                 | 1.8 (1.5, 2.2) | 1.0<br>153/1052                                                                              | 1.1 (0.9, 1.5)<br>133/728    | 1.1 (0.8, 1.5)<br>90/468     | 2.2 (1.7, 2.9)<br>145/486    |
| Model 2 <sup>a</sup>       | 484/2550                 | 1.5 (1.1, 2.1) | 1.0<br>140/991                                                                               | 1.2 (0.9, 1.5)<br>125/683    | 1.0 (0.7, 1.4)<br>81/437     | 1.8 (1.3, 2.5)<br>138/439    |

<sup>a</sup>Model 2: Model 1 + smoking (never, former, current), hypertension, diabetes, family history, LDL/HDL ratio.

**Table S4.** Odds ratios (OR), with 95% confidence intervals (CI) for coronary artery calcium score (Agatston score) >0, and ≥100 by sex and blood cadmium concentration in never-smokers in a Swedish population-based cohort. Quartiles are mutually-exclusive, but cut-points in the columns are rounded.

| Outcome, group, and model  | Number of subjects/cases | OR per 1 µg/L   | OR (95% CI) and number of cases/total number per quartile of blood cadmium (Q1 – Q4) in µg/L |                            |                            |                           |
|----------------------------|--------------------------|-----------------|----------------------------------------------------------------------------------------------|----------------------------|----------------------------|---------------------------|
|                            |                          |                 | Q1<br><0.16                                                                                  | Q2<br>0.16 – 0.24          | Q3<br>0.24 – 0.39          | Q4<br>0.39 – 8.5          |
| <b>Calcium score &gt;0</b> |                          |                 |                                                                                              |                            |                            |                           |
| <b>All</b>                 |                          |                 |                                                                                              |                            |                            |                           |
| Model 1 (age and sex)      | 874/2520                 | 1.1 (0.6 , 2.1) | 1.0<br>395/950                                                                               | 1.0 (0.8 , 1.2)<br>251/727 | 0.9 (0.7 , 1.2)<br>163/589 | 1.1 (0.7 , 1.5)<br>65/254 |
| Model 2 <sup>a</sup>       | 848/2446                 | 1.1 (0.5 , 2.1) | 1.0<br>384/925                                                                               | 1.0 (0.8 , 1.3)<br>245/710 | 1.0 (0.8 , 1.3)<br>156/565 | 1.1 (0.8 , 1.6)<br>63/246 |
| <b>Women</b>               |                          |                 |                                                                                              |                            |                            |                           |
| Model 1 (age)              | 1227/237                 | 1.0 (0.4 , 2.4) | 1.0<br>44/224                                                                                | 1.0 (0.6 , 1.5)<br>73/363  | 0.8 (0.5 , 1.2)<br>75/422  | 1.0 (0.6 , 1.6)<br>45/218 |
| Model 2 <sup>a</sup>       | 228/1193                 | 0.8 (0.3 , 1.9) | 1.0<br>42/216                                                                                | 1.0 (0.7 , 1.6)<br>72/359  | 0.9 (0.5 , 1.3)<br>71/406  | 1.0 (0.6 , 1.6)<br>43/212 |
| <b>Men</b>                 |                          |                 |                                                                                              |                            |                            |                           |
| Model 1 (age)              | 1293/637                 | 1.2 (0.4 , 3.8) | 1.0<br>351/726                                                                               | 0.9 (0.7 , 1.2)<br>178/364 | 1.0 (0.7 , 1.4)<br>88/167  | 1.1 (0.5 , 2.2)<br>20/36  |
| Model 2 <sup>a</sup>       | 620/1253                 | 1.8 (0.6 , 6.0) | 1.0<br>342/709                                                                               | 1.0 (0.8 , 1.3)<br>173/351 | 1.1 (0.8 , 1.6)<br>85/159  | 1.4 (0.7 , 2.8)<br>20/34  |
| <b>Calcium score ≥100</b>  |                          |                 |                                                                                              |                            |                            |                           |
| <b>All</b>                 |                          |                 |                                                                                              |                            |                            |                           |
| Model 1 (age and sex)      | 2520/208                 | 2.5 (0.9 , 6.8) | 1.0<br>96/950                                                                                | 0.9 (0.6 , 1.3)<br>55/727  | 1.1 (0.7 , 1.7)<br>40/589  | 1.7 (0.9 , 3.0)<br>17/254 |
| Model 2 <sup>a</sup>       | 200/2446                 | 2.8 (1.0 , 7.5) | 1.0<br>93/925                                                                                | 1.0 (0.7 , 1.4)<br>53/710  | 1.2 (0.8 , 1.9)<br>37/565  | 1.9 (1.0 , 3.6)<br>17/246 |
| <b>Women</b>               |                          |                 |                                                                                              |                            |                            |                           |
| Model 1 (age)              | 1227/33                  | 4.1 (1.3 , 13)  | 1.0<br>3/224                                                                                 | 1.9 (0.5 , 7.2)<br>10/363  | 1.5 (0.4 , 5.5)<br>9/422   | 3.7 (1.0 , 13)<br>11/218  |
| Model 2 <sup>a</sup>       | 32/1193                  | 3.4 (1.0 , 11)  | 1.0<br>3/216                                                                                 | 2.0 (0.5 , 7.6)<br>10/359  | 1.5 (0.4 , 5.7)<br>8/406   | 3.6 (1.0 , 14)<br>11/212  |
| <b>Men</b>                 |                          |                 |                                                                                              |                            |                            |                           |
| Model 1 (age)              | 1293/175                 | 1.3 (0.3 , 6.1) | 1.0<br>93/726                                                                                | 0.9 (0.6 , 1.3)<br>45/364  | 1.2 (0.8 , 2.0)<br>31/167  | 1.0 (0.4 , 2.6)<br>6/36   |
| Model 2 <sup>a</sup>       | 168/1253                 | 1.7 (0.3 , 8.7) | 1.0<br>90/709                                                                                | 0.9 (0.6 , 1.3)<br>43/351  | 1.3 (0.8 , 2.1)<br>29/159  | 1.3 (0.5 , 3.4)<br>6/34   |

<sup>a</sup>Model 2: Model 1 + hypertension, diabetes, family history, LDL/HDL ratio

**Table S5.** Prevalence ratios (95% confidence intervals) for coronary artery calcium scores (Agatston score) >0 and ≥100, overall and by sex for sensitivity analyses with additional adjustment for cardiovascular risk factors, study site, and smoking pack-years, respectively, and after excluding participants with the highest (n = 26) and lowest (n = 26) exposures. Quartiles are mutually-exclusive, but cut points in the columns are rounded.

| Outcome, group, and model                      | Number of cases/subjects | PR per 1 µg/L  | PR (95% CI) and number of cases/total number per quartile of blood cadmium (Q1 – Q4) in µg/L |                              |                              |                              |
|------------------------------------------------|--------------------------|----------------|----------------------------------------------------------------------------------------------|------------------------------|------------------------------|------------------------------|
|                                                |                          |                | 1<br><0.16                                                                                   | 2<br>0.16 – 0.24             | 3<br>0.24 – 0.39             | 4<br>0.39 – 8.5              |
| <b>CACS &gt;0: All</b>                         |                          |                |                                                                                              |                              |                              |                              |
| Model 2 <sup>a</sup>                           | 2143/5295                | 1.1 (1.1, 1.2) | 1.0<br>(574/1329)                                                                            | 1.0 (0.9, 1.1)<br>(527/1342) | 0.9 (0.9, 1.0)<br>(454/1320) | 1.1 (1.0, 1.3)<br>(588/1304) |
| Model 2 + CVD risk factors <sup>b</sup>        | 2067/5162                | 1.1 (1.0, 1.2) | 1.0<br>561/1307                                                                              | 1.0 (0.9, 1.1)<br>515/1319   | 0.9 (0.9, 1.0)<br>437/1287   | 1.1 (1.0, 1.2)<br>554/1249   |
| Model 2 + site <sup>c</sup>                    | 2143/5295                | 1.1 (1.1, 1.2) | 1.0<br>(574/1329)                                                                            | 1.0 (0.9, 1.1)<br>(527/1342) | 0.9 (0.9, 1.0)<br>(454/1320) | 1.1 (1.0, 1.3)<br>(588/1304) |
| Model 2 + pack-years <sup>d</sup>              | 2143/5295                | 1.1 (1.0, 1.2) | 1.0<br>(574/1329)                                                                            | 1.0 (0.9, 1.1)<br>(527/1342) | 0.9 (0.8, 1.0)<br>(454/1320) | 1.1 (1.0, 1.2)<br>(588/1304) |
| Model 2 excluding low + high B-Cd <sup>e</sup> | 2112/5243                | 1.3 (1.1, 1.4) | 1.0<br>(559/1303)                                                                            | 1.0 (0.9, 1.1)<br>(527/1342) | 0.9 (0.9, 1.0)<br>(454/1320) | 1.1 (1.0, 1.3)<br>(572/1278) |
| <b>CACS &gt;0: Women</b>                       |                          |                |                                                                                              |                              |                              |                              |
| Model 2 <sup>a</sup>                           | 735/2745                 | 1.1 (1.0, 1.2) | 1.0<br>(73/338)                                                                              | 1.0 (0.8, 1.3)<br>(164/659)  | 0.9 (0.7, 1.2)<br>(206/883)  | 1.2 (0.9, 1.5)<br>(292/865)  |
| Model 2 + CVD risk factors <sup>b</sup>        | 710/2686                 | 1.0 (0.9, 1.2) | 1.0<br>72/333                                                                                | 1.0 (0.8, 1.3)<br>160/648    | 0.9 (0.7, 1.1)<br>199/865    | 1.1 (0.9, 1.4)<br>279/840    |
| Model 2 + site <sup>c</sup>                    | 735/2745                 | 1.1 (1.0, 1.2) | 1.0<br>(73/338)                                                                              | 1.1 (0.8, 1.3)<br>(164/659)  | 0.9 (0.7, 1.2)<br>(206/883)  | 1.2 (0.9, 1.5)<br>(292/865)  |
| Model 2 + pack-years <sup>d</sup>              | 735/2745                 | 1.0 (0.9, 1.2) | 1.0<br>(73/338)                                                                              | 1.0 (0.8, 1.3)<br>(164/659)  | 1.0 (0.9, 1.1)<br>(206/883)  | 1.1 (1.0, 1.3)<br>(292/865)  |
| Model 2 excluding low + high B-Cd <sup>e</sup> | 726/2725                 | 1.4 (1.2, 1.7) | 1.0<br>(72/336)                                                                              | 1.1 (0.8, 1.3)<br>(164/659)  | 0.9 (0.7, 1.2)<br>(206/883)  | 1.2 (0.9, 1.5)<br>(284/847)  |
| <b>CACS &gt;0: Men</b>                         |                          |                |                                                                                              |                              |                              |                              |
| Model 2 <sup>a</sup>                           | 1408/2550                | 1.1 (1.0, 1.2) | 1.0<br>501/991                                                                               | 1.0 (0.9, 1.1)<br>363/683    | 1.0 (0.9, 1.1)<br>248/437    | 1.2 (1.0, 1.3)<br>296/439    |
| Model 2 + CVD risk factors <sup>b</sup>        | 1357/2476                | 1.1 (1.0, 1.2) | 1.0<br>489/974                                                                               | 1.0 (0.9, 1.1)<br>355/671    | 1.0 (0.9, 1.1)<br>238/422    | 1.2 (1.0, 1.3)<br>275/409    |
| Model 2 + site <sup>c</sup>                    | 1408/2550                | 1.1 (1.0, 1.2) | 1.0<br>501/991                                                                               | 1.0 (0.9, 1.1)<br>363/683    | 1.0 (0.9, 1.1)<br>248/437    | 1.2 (1.0, 1.3)<br>296/439    |
| Model 2 + pack-years <sup>d</sup>              | 1408/2550                | 1.1 (1.0, 1.2) | 1.0<br>501/991                                                                               | 1.0 (0.9, 1.1)<br>363/683    | 1.0 (0.9, 1.1)<br>248/437    | 1.1 (1.0, 1.3)<br>296/439    |
| Model 2 excluding low + high B-Cd <sup>e</sup> | 1386/2518                | 1.1 (1.0, 1.3) | 1.0<br>487/967                                                                               | 1.0 (0.9, 1.1)<br>363/683    | 1.0 (0.9, 1.1)<br>248/437    | 1.2 (1.0, 1.3)<br>288/431    |
| <b>CACS &gt;100: All</b>                       |                          |                |                                                                                              |                              |                              |                              |
| Model 2 <sup>a</sup>                           | 654/5295                 | 1.3 (1.1, 1.4) | 1.0<br>148/1329                                                                              | 1.1 (0.9, 1.3)<br>152/1342   | 1.0 (0.8, 1.3)<br>126/1320   | 1.6 (1.3, 2.0)<br>228/1304   |
| Model 2 + CVD risk factors <sup>b</sup>        | 620/5162                 | 1.2 (1.1, 1.3) | 1.0<br>145/1307                                                                              | 1.0 (0.8, 1.3)<br>144/1319   | 1.0 (0.8, 1.3)<br>123/1287   | 1.5 (1.2, 1.9)<br>208/1249   |
| Model 2 + site <sup>c</sup>                    | 654/5295                 | 1.3 (1.1, 1.4) | 1.0<br>148/1329                                                                              | 1.1 (0.9, 1.3)<br>152/1342   | 1.0 (0.8, 1.3)<br>126/1320   | 1.6 (1.3, 2.0)<br>228/1304   |
| Model 2 + pack-years <sup>d</sup>              | 654/5295                 | 1.2 (1.1, 1.3) | 1.0<br>148/1329                                                                              | 1.1 (0.9, 1.3)<br>152/1342   | 1.0 (0.8, 1.2)<br>126/1320   | 1.4 (1.1, 1.7)<br>228/1304   |
| Model 2 excluding low + high B-Cd <sup>e</sup> | 642/5243                 | 1.7 (1.4, 2.0) | 1.0<br>145/1303                                                                              | 1.1 (0.9, 1.3)<br>152/1342   | 1.0 (0.8, 1.3)<br>126/1320   | 1.6 (1.3, 2.0)<br>219/1278   |

| <b>CACS &gt;100:<br/>Women</b>                 |          |                |                |                           |                          |                           |
|------------------------------------------------|----------|----------------|----------------|---------------------------|--------------------------|---------------------------|
| Model 2 <sup>a</sup>                           | 170/2745 | 1.2 (1.1, 1.4) | 1.0<br>8/338   | 1.4 (0.6, 3.1)<br>27/659  | 1.6 (0.7, 3.3)<br>45/883 | 2.6 (1.3, 5.5)<br>90/865  |
| Model 2 + CVD risk factors <sup>b</sup>        | 162/2686 | 1.2 (1.0, 1.4) | 1.0<br>8/333   | 1.3 (0.6, 2.8)<br>25/648  | 1.5 (0.7, 3.2)<br>44/865 | 2.4 (1.2, 5.1)<br>85/840  |
| Model 2 + site <sup>c</sup>                    | 170/2745 | 1.1 (1.0, 1.2) | 1.0<br>8/338   | 1.4 (0.7, 3.1)<br>27/659  | 1.6 (0.8, 3.3)<br>45/883 | 2.6 (1.3, 5.5)<br>90/865  |
| Model 2 + pack-years <sup>d</sup>              | 170/2745 | 1.1 (0.9, 1.3) | 1.0<br>8/338   | 1.4 (0.6, 3.1)<br>27/659  | 1.5 (0.7, 3.1)<br>45/883 | 2.2 (1.0, 4.6)<br>90/865  |
| Model 2 excluding low + high B-Cd <sup>e</sup> | 164/2725 | 2.6 (1.8, 3.6) | 1.0<br>7/336   | 1.6 (0.7, 3.7)<br>27/659  | 1.8 (0.8, 3.9)<br>45/883 | 3.0 (1.4, 6.5)<br>85/847  |
| <b>CACS &gt;100: Men</b>                       |          |                |                |                           |                          |                           |
| Model 2 <sup>a</sup>                           | 484/2550 | 1.2 (1.1, 1.4) | 1.0<br>140/991 | 1.1 (0.9, 1.4)<br>125/683 | 1.0 (0.8, 1.3)<br>81/437 | 1.5 (1.1, 1.9)<br>138/439 |
| Model 2 + CVD risk factors <sup>b</sup>        | 458/2476 | 1.2 (1.0, 1.4) | 1.0<br>137/974 | 1.1 (0.9, 1.3)<br>119/671 | 1.0 (0.8, 1.3)<br>79/422 | 1.4 (1.1, 1.8)<br>123/409 |
| Model 2 + site <sup>c</sup>                    | 484/2550 | 1.2 (1.0, 1.4) | 1.0<br>140/991 | 1.1 (0.9, 1.4)<br>125/683 | 1.0 (0.8, 1.3)<br>81/437 | 1.5 (1.1, 1.9)<br>138/439 |
| Model 2 + pack-years <sup>d</sup>              | 484/2550 | 1.2 (1.0, 1.4) | 1.0<br>140/991 | 1.1 (0.9, 1.4)<br>125/683 | 1.0 (0.8, 1.3)<br>81/437 | 1.3 (1.0, 1.7)<br>138/439 |
| Model 2 excluding low + high B-Cd <sup>e</sup> | 478/2518 | 1.3 (1.1, 1.7) | 1.0<br>138/967 | 1.1 (0.9, 1.4)<br>125/683 | 1.0 (0.8, 1.3)<br>81/437 | 1.4 (1.1, 1.8)<br>134/431 |

<sup>a</sup>Model 2 is adjusted for age, sex, smoking category (never, former, current), hypertension, diabetes, heredity, LDL/HDL ratio.

<sup>b</sup>Model 2 + lipid-lowering medications, waist circumference, education (3 categories), low physical activity, born outside Sweden, systolic blood pressure, log-transformed C-reactive protein.

<sup>c</sup>Model 2 + study site (Gothenburg or Malmo)

<sup>d</sup>Model 2 + smoking pack-years (continuous)

<sup>e</sup>Model 2 after excluding participants with B-Cd below the 0.5<sup>th</sup> percentile or above the 99.5<sup>th</sup> percentile for the study population as a whole.



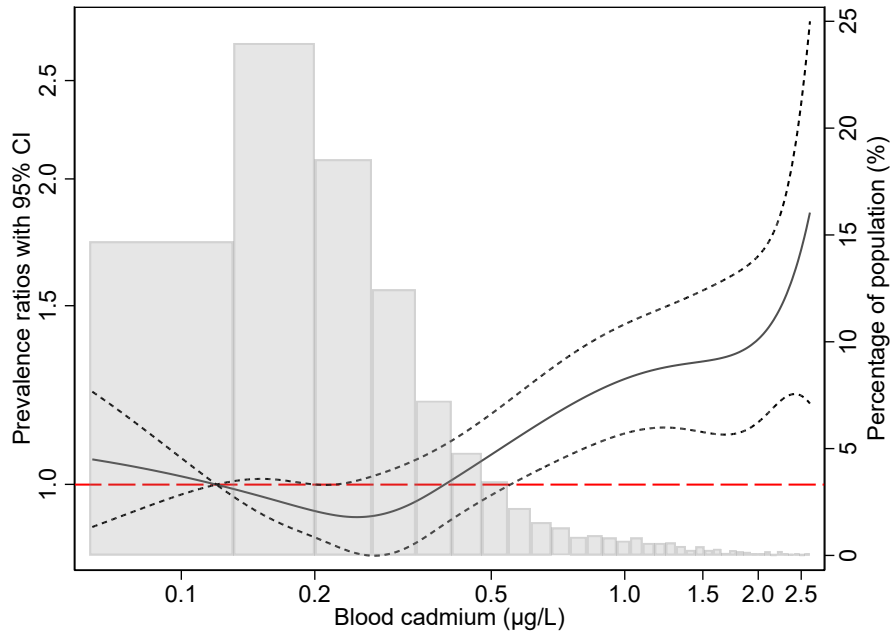

**Figure S1.** Adjusted PRs (solid line) with 95% CI (short dashed lines) for the relation between blood cadmium concentrations ( $\mu\text{g/L}$ ) and CACS  $>0$  (Model 2, Table S5, All individuals, but 52 individuals excluded). Prevalence ratios were modelled using unrestricted cubic splines with three knots (0.16, 0.24 and 0.38) at percentiles 25%, 50% and 75%, in a Poisson regression model adjusted for age, sex, smoking, hypertension, diabetes, family history, and LDL/HDL ratio. The reference value for blood cadmium was  $0.12 \mu\text{g/L}$  (median for Q1). The histogram shows the frequency distribution of blood cadmium concentrations.

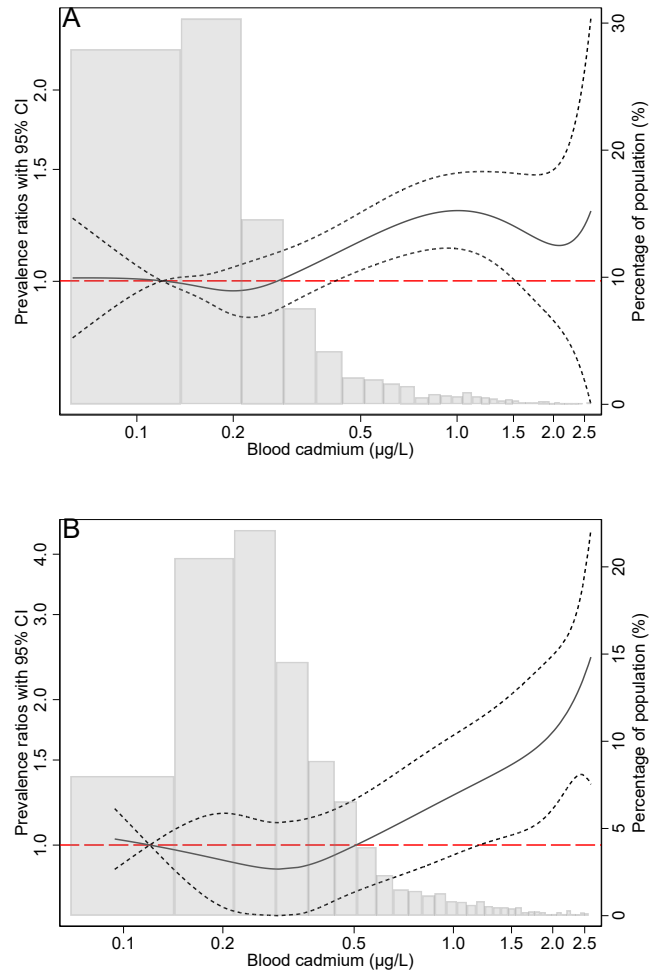

**Figure S2.** Adjusted PRs (solid line) with 95% CI (short dashed lines) for the relation between blood cadmium concentrations ( $\mu\text{g/L}$ ) and CACS  $>0$  among men (A) and women (B) (Model 2, Table S5, 52 individuals excluded). Prevalence ratios were modelled using unrestricted cubic splines with three knots (0.13, 0.19 and 0.30 for men, 0.20, 0.29, 0.44 for women) at percentiles 25%, 50% and 75%, in a Poisson regression model adjusted for age, sex, smoking, hypertension, diabetes, family history, and LDL/HDL ratio. The reference value for blood cadmium was  $0.12 \mu\text{g/L}$  (median for Q1). The histogram shows the frequency distribution of blood cadmium concentrations.

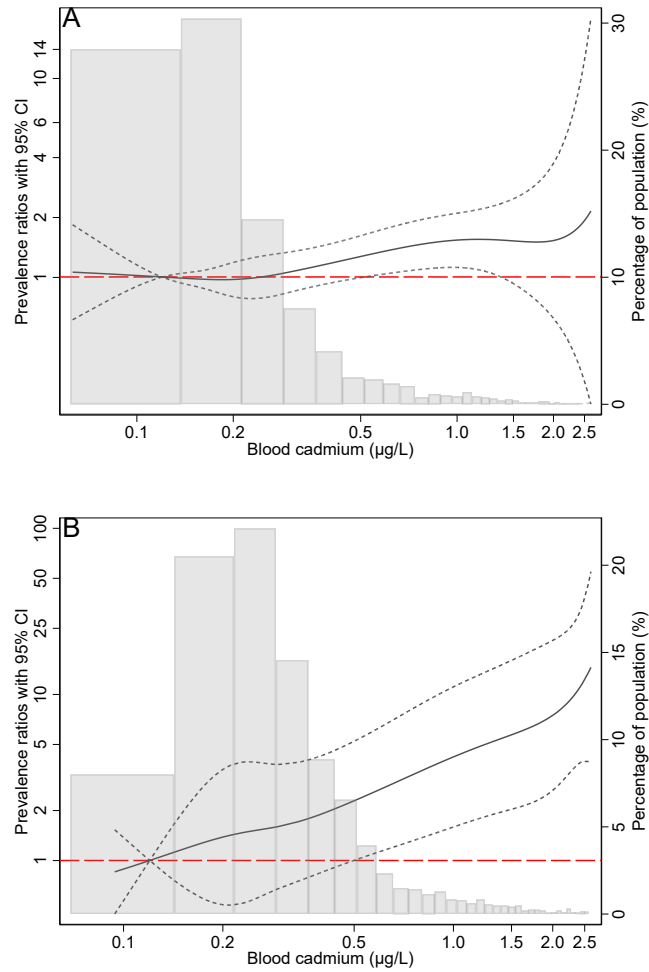

**Figure S3.** Adjusted PRs (solid line) with 95% CI (short dashed lines) for the relation between blood cadmium concentrations ( $\mu\text{g/L}$ ) and  $\text{CACS} \geq 100$  among men (A) and women (B) (Model 2, Table S5, 52 individuals excluded). Prevalence ratios were modelled using unrestricted cubic splines with three knots (0.13, 0.19 and 0.30 for men, 0.20, 0.29, 0.44 for women) at percentiles 25%, 50% and 75%, in a Poisson regression model adjusted for age, sex, smoking, hypertension, diabetes, family history, and LDL/HDL ratio. The reference value for blood cadmium was  $0.12 \mu\text{g/L}$  (median for Q1). The histogram shows the frequency distribution of blood cadmium concentrations.

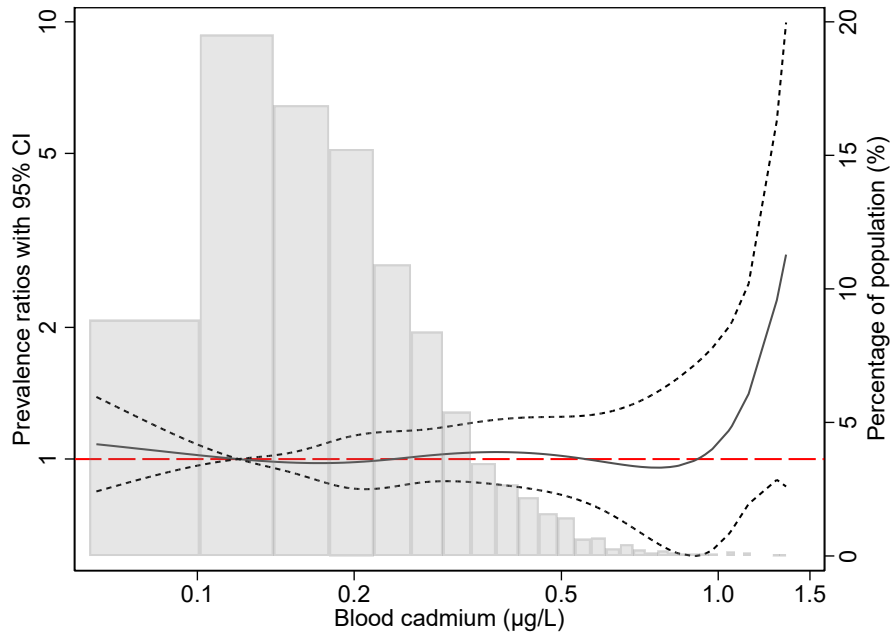

**Figure S4.** Adjusted PRs (solid line) with 95% CI (short dashed lines) for the relation between blood cadmium concentrations ( $\mu\text{g/L}$ ) and CACS  $>0$  among never-smokers (Model 2, Table 3, but 52 individuals excluded). Prevalence ratios were modelled using unrestricted cubic splines with three knots (0.14, 0.19 and 0.27) at percentiles 25%, 50% and 75%, in a Poisson regression model adjusted for age, sex, smoking, hypertension, diabetes, family history, and LDL/HDL ratio. The reference value for blood cadmium was  $0.12 \mu\text{g/L}$  (median for Q1). The histogram shows the frequency distribution of blood cadmium concentrations.

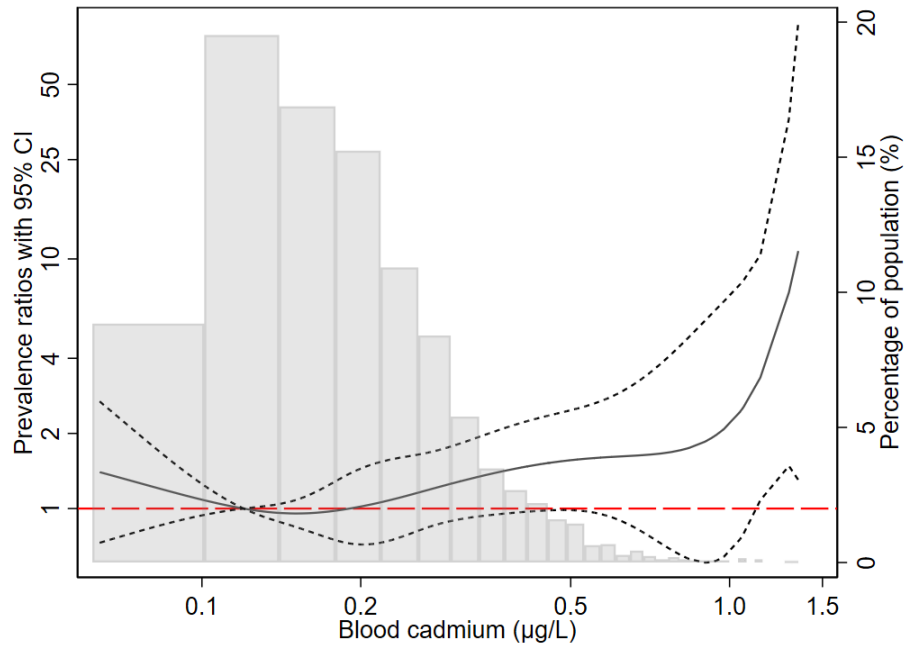

**Figure S5.** Adjusted PRs (solid line) with 95% CI (short dashed lines) for the relation between blood cadmium concentrations ( $\mu\text{g/L}$ ) and **CACS  $\geq 100$  among never-smokers** (Model 2, Table 3, but 52 individuals excluded). Prevalence ratios were modelled using unrestricted cubic splines with three knots (0.14, 0.19 and 0.27) at percentiles 25%, 50% and 75%, in a Poisson regression model adjusted for age, sex, smoking, hypertension, diabetes, family history, and LDL/HDL ratio. The reference value for blood cadmium was  $0.12 \mu\text{g/L}$  (median for Q1). The histogram shows the frequency distribution of blood cadmium concentrations.
